# Supplementary material for: ANSA Banner Graft in Rhinoplasty: Long-Term Results in Projection and Rotation of the nasal tip
Source: Research Square preprint supplement (doi:10.21203/rs.3.rs-7889998/v1), 2025-11-04
Supplement: Supplementary file 2 [file bbde3a5fd08efa43b91ab3b9.xlsx]

## Sheet: Hoja 1
GOODE: PRE	Rotation
	Naso - Frontal Angle	Naso - Labial Angle	Proyection	Goode (0,55-0,62)	dX	dY	D=Distancia SURCO-punta	cX	cY	C=Distancia NASION-punta				%	Medida	%	Medida	%	Medida	%	Medida	%	Medida	%	Medida	%	Medida	%	Medida	%	ángulo nasolabial	ángulo nasofrontal
1	137.7	103	52.9	0.646771	1.33	0.01	1.33004	1.2	1.67	2.05643
2	152.9	84.7	76.2	0.561975	1.17	0.17	1.18229	0.86	1.92	2.10381
3	142.9	107.9	46.2	0.5655	1.26	0	1.26	1.18	1.89	2.22812
4	135.3	92.4°	41.9	0.666879	1.16	0.03	1.16039	1.11	1.34	1.74003
5	150.8	99.9	58.5	0.499683	1.32	0.09	1.32306	1.22	2.35	2.64781
6	140.4	102.9	48.3	0.506861	1.2	0.07	1.20204	1.29	1.99	2.37154
7	143.3	91.8	50	0.581493	1.35	0.08	1.35237	1.22	1.98	2.32568
8	137.2	101.2	57.9	0.610018	1.32	0.09	1.32306	1.21	1.8	2.16889
9	144.7	100	44.4	0.569142	1.59	0.15	1.59706	1.35	2.46	2.80608
10	147.6	99.3	63.8	0.447566	1.16	0.16	1.17098	1.84	1.86	2.61633
11	143.5	90	49.7	0.567369	1.93	0.06	1.93093	1.92	2.81	3.40331
12	139.9	90.3	53.6	0.628748	1.44	0.09	1.44281	1.33	1.87	2.29473
13	138.9	96.7	57.6	0.563269	1.21	0.07	1.21202	1.01	1.9	2.15177
14	142.9	110.5	38.3	0.579255	1.2	0.11	1.20503	1.06	1.79	2.08031
15	144	96.5	41	0.58009	1.32	0.21	1.3366	0.97	2.09	2.30413
16	148.8	101.1	61	0.551748	1.4	0.03	1.40032	1.38	2.13	2.53797
17	140.1	93.2	54	0.697822	0.91	0.05	0.911373	0.79	1.04	1.30602
GOODE: POST
1	139	103.3	49.5	0.590509	1.07	0.05	1.07117	0.99	1.52	1.81397
2	154.3	98.5	68.7	0.491504	1.27	0.14	1.27769	1.09	2.36	2.59956
3	140	111.1	46.7	0.596892	1.24	0.04	1.24064	1.21	1.69	2.07851
4	140	100.4	60.3	0.607039	1.19	0.05	1.19105	1.19	1.56	1.96207
5	149	103.2	55.1	0.538389	1.15	0	1.15	1.15	1.8	2.136
6	137.5	106.8	51.3	0.556625	1.18	0.09	1.18343	1.29	1.69	2.12608
7	142.4	98.3	64.7	0.583782	1	0.05	1.00125	0.9	1.46	1.71511
8	137.6	102.8	54.2	0.614042	1.11	0.04	1.11072	1.04	1.48	1.80887
9	140.2	102.8	53.9	0.578549	1.48	0.27	1.50443	1.07	2.37	2.60035
10	143.2	108.5	57.6	0.497689	1.18	0.16	1.1908	1.88	1.48	2.39266
11	145.8	92.3	51.8	0.593606	1.26	0.01	1.26004	1.23	1.73	2.12269
12	141.2	101.4	66.2	0.611339	1.57	0	1.57	1.52	2.07	2.56813
13	137.7	106.9	47.2	0.663026	1.06	0.08	1.06301	0.91	1.32	1.60328
14	142.8	113.2	42.5	0.625378	1.12	0.13	1.12752	0.85	1.59	1.80294
15	144.7	99.4	36	0.596516	1.63	0.23	1.64615	1.27	2.45	2.7596
16	142	104.8	49	0.609996	1.12	0.03	1.1204	1.06	1.5	1.83674
17	140.2	101.3	47.3	0.683246	1.02	0.04	1.02078	0.89	1.2	1.49402
GOODE: LONG TERM
1	138.1	103.3	48.5	0.634809	1.3	0.23	1.32019	0.95	1.85	2.07966
2	149.9	98.5	63.9	0.496712	1.14	0.07	1.14215	1.08	2.03	2.29941
3	143.2	112.5	51	0.636027	0.95	0.08	0.953362	0.78	1.28	1.49893
4	141.7	100.4	57.7	0.59581	1.17	0.02	1.17017	1.18	1.57	1.964
5	153.1	102.8	55.1	0.537529	1.15	0.02	1.15017	1.04	1.87	2.13974
6	137.6	106.1	59.8	0.589604	1.23	0	1.23	1.12	1.76	2.08614
7	135.7	100.6	55.6	0.595438	0.94	0	0.94	0.91	1.29	1.57867
8	135.2	109.2	42.6	0.626171	1.15	0.01	1.15004	1.14	1.44	1.83663
9	143.2	102.2	57.6	0.58413	1.39	0.25	1.4123	0.91	2.24	2.41779
10	147.2	107.3	58.6	0.479143	1.08	0.17	1.0933	1.77	1.44	2.28178
11	145.4	92.6	63.3	0.584413	0.98	0.05	0.981275	0.88	1.43	1.67908
12	140.6	101.3	53	0.637204	1.61	0.06	1.61112	1.48	2.05	2.52842
13	137.1	107.3	45	0.633154	0.97	0.05	0.971288	0.93	1.22	1.53405
14	139.1	113.2	35.8	0.632775	1.14	0.08	1.1428	1.09	1.44	1.80602
15	139.5	103.1	36.1	0.57045	1.52	0.09	1.52266	1.32	2.32	2.66923
16	142.5	106.8	53	0.614003	1.01	0.01	1.01005	0.94	1.35	1.64502
17	142.4	103.7	50	0.697822	0.91	0.05	0.911373	0.79	1.04	1.30602
