# Supplementary figures and images for: ANSA Banner Graft in Rhinoplasty: Long-Term Results in Projection and Rotation of the nasal tip
Source: Research Square preprint supplement (doi:10.21203/rs.3.rs-7889998/v1), 2025-11-04

**Annex 1: “ROE” satisfaction survey**


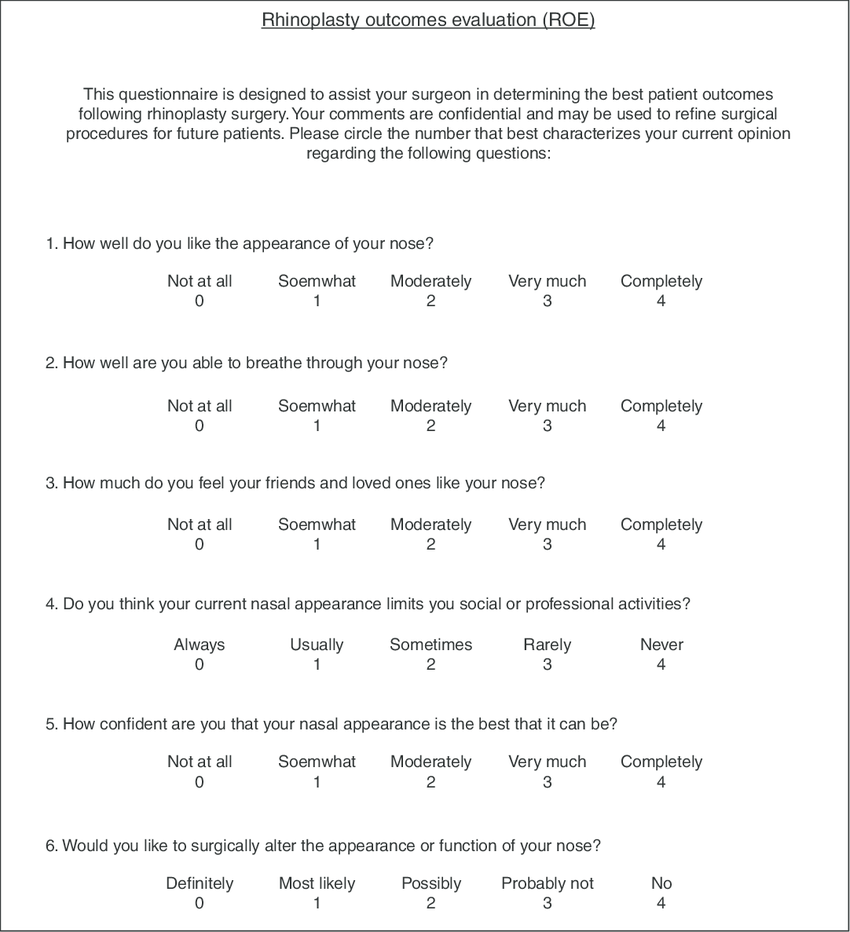

Supplement: Supplementary file 1 [file 18f2b0d88f2b380a8efa237a.docx]
